# Supplementary material for: Linguistic Analysis for Identifying Depression and Subsequent Suicidal Ideation on Weibo: Machine Learning Approaches
Source: MDPI journal article supplement (doi:10.3390/ijerph20032688), 2023-02-02
Supplement: s1 [file s1]

**Table S1.** The full logistic regression model of using the simplified Chinese version of LIWC (SCLIWC) features to classify the depression and control groups.

| <b>SCLIWC features</b> | <b><math>\beta</math></b> | <b><i>S.E.</i></b> | <b><i>Z</i></b> | <b><i>p</i></b> | <b><i>sig</i></b> |
|------------------------|---------------------------|--------------------|-----------------|-----------------|-------------------|
| (Intercept)            | -0.47                     | 0.06               | -8.00           | 0.00            | ***               |
| I                      | 1.02                      | 0.10               | 10.52           | < 2e-16         | ***               |
| We                     | 0.14                      | 0.06               | 2.14            | 0.03            | *                 |
| You                    | 0.01                      | 0.07               | 0.21            | 0.83            |                   |
| SheHe                  | -0.09                     | 0.06               | -1.48           | 0.14            |                   |
| They                   | -0.01                     | 0.06               | -0.20           | 0.84            |                   |
| iPron                  | 0.09                      | 0.07               | 1.19            | 0.23            |                   |
| Verb                   | 0.10                      | 0.12               | 0.86            | 0.39            |                   |
| AuxVerb                | -0.09                     | 0.13               | -0.65           | 0.52            |                   |
| Adverb                 | 0.02                      | 0.13               | 0.18            | 0.86            |                   |
| Preps                  | 0.07                      | 0.07               | 1.01            | 0.31            |                   |
| Conj                   | 0.03                      | 0.09               | 0.35            | 0.73            |                   |
| Negate                 | -0.06                     | 0.06               | -1.04           | 0.30            |                   |
| Quant                  | -0.20                     | 0.06               | -3.59           | 0.00            | ***               |
| Number                 | 0.10                      | 0.05               | 1.85            | 0.06            |                   |
| Swear                  | -0.05                     | 0.07               | -0.76           | 0.45            |                   |
| YouPL                  | -0.02                     | 0.06               | -0.36           | 0.72            |                   |
| PrepEnd                | 0.21                      | 0.06               | 3.48            | 0.00            | ***               |
| SpecArt                | -0.30                     | 0.06               | -5.09           | 0.00            | ***               |
| QuanUnit               | -0.04                     | 0.06               | -0.70           | 0.49            |                   |
| Interjunction          | 0.01                      | 0.11               | 0.07            | 0.95            |                   |
| MultiFun               | -0.26                     | 0.09               | -2.96           | 0.00            | **                |
| PastM                  | -0.13                     | 0.07               | -1.84           | 0.07            |                   |
| PresentM               | 0.11                      | 0.07               | 1.67            | 0.09            |                   |
| FutureM                | 0.02                      | 0.06               | 0.40            | 0.69            |                   |
| ProgM                  | -0.14                     | 0.09               | -1.55           | 0.12            |                   |
| Social                 | 0.23                      | 0.08               | 2.80            | 0.01            | **                |
| Family                 | -0.16                     | 0.06               | -2.70           | 0.01            | **                |
| Friend                 | 0.07                      | 0.05               | 1.43            | 0.15            |                   |
| Humans                 | -0.06                     | 0.06               | -1.07           | 0.29            |                   |
| Affect                 | 0.40                      | 0.13               | 3.00            | 0.00            | **                |
| PosEmo                 | -0.25                     | 0.10               | -2.43           | 0.02            | *                 |
| NegEmo                 | 0.40                      | 0.12               | 3.23            | 0.00            | **                |
| Anx                    | 0.15                      | 0.08               | 1.87            | 0.06            |                   |
| Anger                  | -0.12                     | 0.08               | -1.65           | 0.10            |                   |
| Sad                    | 0.41                      | 0.09               | 4.44            | 0.00            | ***               |
| Insight                | 0.06                      | 0.07               | 0.90            | 0.37            |                   |
| Cause                  | 0.07                      | 0.07               | 1.11            | 0.27            |                   |
| Discrep                | 0.51                      | 0.13               | 4.04            | 0.00            | ***               |
| Tentat                 | 0.34                      | 0.10               | 3.41            | 0.00            | ***               |
| Certain                | 0.05                      | 0.07               | 0.78            | 0.44            |                   |

|                 |       |      |       |         |     |
|-----------------|-------|------|-------|---------|-----|
| Inhibition      | -0.09 | 0.06 | -1.47 | 0.14    |     |
| Inclusive       | 0.02  | 0.07 | 0.24  | 0.81    |     |
| Exclusive       | -0.35 | 0.10 | -3.57 | 0.00    | *** |
| Percept         | -0.40 | 0.11 | -3.71 | 0.00    | *** |
| See             | 0.38  | 0.11 | 3.48  | 0.00    | *** |
| Hear            | 0.17  | 0.07 | 2.34  | 0.02    | *   |
| Feel            | -0.06 | 0.06 | -0.91 | 0.36    |     |
| Bio             | -0.06 | 0.10 | -0.57 | 0.57    |     |
| Body            | 0.05  | 0.08 | 0.69  | 0.49    |     |
| Health          | 0.70  | 0.09 | 7.95  | 0.00    | *** |
| Sexual          | -0.11 | 0.06 | -1.91 | 0.06    |     |
| Ingest          | -0.26 | 0.09 | -2.88 | 0.00    | **  |
| Relative        | -0.40 | 0.11 | -3.80 | 0.00    | *** |
| Motion          | 0.32  | 0.07 | 4.89  | 0.00    | *** |
| Space           | 0.10  | 0.09 | 1.11  | 0.27    |     |
| Time            | -0.15 | 0.08 | -1.86 | 0.06    |     |
| Work            | -0.19 | 0.06 | -2.92 | 0.00    | **  |
| Achieve         | -0.30 | 0.07 | -4.33 | 0.00    | *** |
| Leisure         | -0.01 | 0.06 | -0.15 | 0.88    |     |
| Home            | 0.00  | 0.06 | 0.01  | 0.99    |     |
| Money           | -0.21 | 0.08 | -2.67 | 0.01    | **  |
| Religion        | -0.09 | 0.06 | -1.41 | 0.16    |     |
| Death           | 0.36  | 0.08 | 4.37  | 0.00    | *** |
| Assent          | -0.05 | 0.10 | -0.55 | 0.59    |     |
| Nonfl           | 0.21  | 0.08 | 2.60  | 0.01    | **  |
| Filler          | -0.28 | 0.08 | -3.57 | 0.00    | *** |
| Psychology      | -0.01 | 0.06 | -0.25 | 0.80    |     |
| Love            | -0.11 | 0.06 | -1.82 | 0.07    |     |
| tPast           | 0.07  | 0.07 | 1.00  | 0.32    |     |
| tNow            | -0.04 | 0.07 | -0.66 | 0.51    |     |
| tFuture         | 0.10  | 0.08 | 1.30  | 0.19    |     |
| Period          | -0.15 | 0.07 | -2.15 | 0.03    | *   |
| Comma           | -0.28 | 0.06 | -4.68 | 0.00    | *** |
| Colon           | -0.10 | 0.06 | -1.63 | 0.10    |     |
| SemiC           | -0.29 | 0.08 | -3.51 | 0.00    | *** |
| QMark           | -0.09 | 0.08 | -1.11 | 0.27    |     |
| Exclam          | -0.22 | 0.07 | -3.29 | 0.00    | **  |
| Dash            | 0.31  | 0.08 | 3.77  | 0.00    | *** |
| Quote           | -0.27 | 0.08 | -3.25 | 0.00    | **  |
| Apostrophe      | -0.11 | 0.11 | -0.99 | 0.32    |     |
| Parenth         | 0.18  | 0.07 | 2.69  | 0.01    | **  |
| OtherP          | -0.17 | 0.07 | -2.38 | 0.02    | *   |
| WordCount       | 1.00  | 0.07 | 14.54 | < 2e-16 | *** |
| WordPerSentence | -0.59 | 0.20 | -3.02 | 0.00    | **  |

|                  |       |      |       |      |     |
|------------------|-------|------|-------|------|-----|
| RateDicCover     | -0.30 | 0.11 | -2.82 | 0.00 | **  |
| RateNumeral      | -0.70 | 0.09 | -8.11 | 0.00 | *** |
| RateSixLtrWord   | -0.11 | 0.09 | -1.27 | 0.20 |     |
| RateFourCharWord | -0.19 | 0.08 | -2.31 | 0.02 | *   |
| RateLatinWord    | 0.38  | 0.08 | 4.52  | 0.00 | *** |
| NumEmotion       | -0.76 | 0.10 | -7.61 | 0.00 | *** |
| NumHashTag       | 0.42  | 0.08 | 5.42  | 0.00 | *** |
| NumURLs          | 0.29  | 0.07 | 4.24  | 0.00 | *** |

---

\*\*\*  $p < 0.001$ , \*\*  $p < 0.01$ , \*  $p < 0.05$
